# Supplementary material for: Kinetic features of solvent extraction by N,O-donor ligands of f-elements: a comparative study of diamides based on 1,10-phenanthroline and 2,2′-bipyridine
Source: Royal Society of Chemistry journal article supplement (doi:10.1039/d3cp05081e), 2023-12-18
Supplement: d3cp05081e1.pdf [file d3cp05081e1.pdf]

## Supplementary information for

### Kinetic features of solvent extraction by N,O-donor ligands of *f*-elements: a comparative study of diamides based on 1,10-phenanthroline and 2,2'-bipyridine

Ekaterina A. Konopkina <sup>a</sup>, Alexander V. Gopin <sup>a</sup>, Anton S. Pozdeev <sup>b</sup>, Maria G. Chernysheva <sup>a</sup>, Paulina Kalle <sup>c</sup>, Elizaveta A. Pavlova <sup>a</sup>, Stepan N. Kalmykov <sup>a</sup>, Vladimir G. Petrov <sup>a</sup>, Nataliya E. Borisova <sup>a</sup>, Alexander A. Guda <sup>d</sup>, Petr I. Matveev <sup>a</sup>

<sup>a</sup> Department of Chemistry, Lomonosov Moscow State University, Moscow 119991, Russian Federation

<sup>b</sup> Department of Chemistry and Biochemistry, Utah State University, 0300 Old Main Hill, Logan, UT, 84322-0300, USA

<sup>c</sup> N.S. Kurnakov Institute of General and Inorganic Chemistry of the Russian Academy of Sciences, Moscow, Russian Federation;

<sup>d</sup> The Smart Materials Research Institute, Southern Federal University, Rostov-on-Don 3440906 Russian Federation

#### 1.1. Solvent extraction kinetic

##### Fabrication of the droplet generator

The droplet generator was fabricated from condensation cure silicone Best Mold 10 (SP-Polymer, Russia). The components containing polyorganosiloxanes and tin catalyst were mixed in a 50:1 ratio and transferred into a casting mold. The channel system in it was formed from 330  $\mu\text{m}$  diameter copper wire. After 1 day, the generator was removed from the mold. The Figure S1 shows the scheme of the generator channels. The supply tubes were inserted directly into the generator channels at a depth of 3–5 mm.

##### Measurement of droplet volume and specific contact surface area

Droplets in the capillary tube were imaged by transmitted light microscopy in MBS-9 optical microscope for each trial after the flow was stopped. Images were captured using a Scopetec MDC-560 microscope eyepiece camera and analyzed using ImageJ 1.54 software. The dimensions shown in Figure S2 were measured for the aqueous (convex edges) and organic phase (concave edges) droplets.

The specific interfacial surface was determined as the ratio of the average value of the interfacial surface  $A$  to the average volume of the aqueous phase drop  $V_{\text{aq}}$  in the trial. In all trials, the differences in the values of specific interfacial surface and droplet volume of both aqueous and organic phases did not exceed 4 times. At the same time, the interfacial surface itself changed insignificantly.

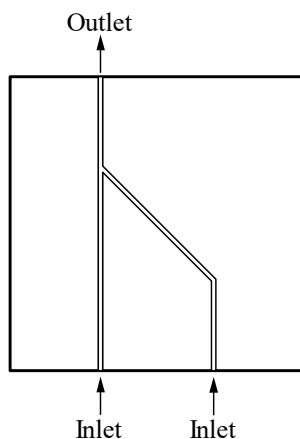

Figure S1 Schematic diagram of the channels of the droplet generator.

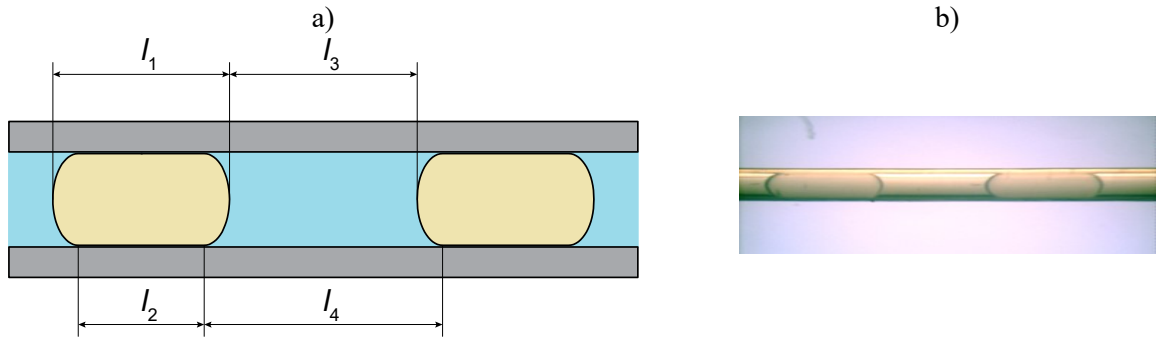

Figure S2 a) Measured droplet parameters of the aqueous ( $l_1, l_2$ ) and organic ( $l_3, l_4$ ) phases, b) microscope image of obtained droplets.

The interfacial areas of the droplets (including the slug caps only and not the region in contact with the capillary wall) were calculated based on the approximation of the surface area of an oblate ellipsoid of revolution:

$$A = 2\pi a^2 \left( 1 + \frac{c^2}{ea^2} \tanh^{-1} e \right),$$

where  $e^2 = 1 - c^2 / a^2$ ,  $a$  – inner radius of the capillary tube,  $c = (l_1 - l_2) / 2$ .

The volumes of aqueous ( $V_{aq}$ ) and organic phase droplets ( $V_{org}$ ) were calculated according to the following expressions:

$$V_{aq} = \pi a^2 l_2 + \frac{4}{3} \pi a^2 \frac{(l_1 - l_2)}{2},$$

$$V_{org} = \pi a^2 l_4 - \frac{4}{3} \pi a^2 \frac{(l_4 - l_3)}{2}.$$

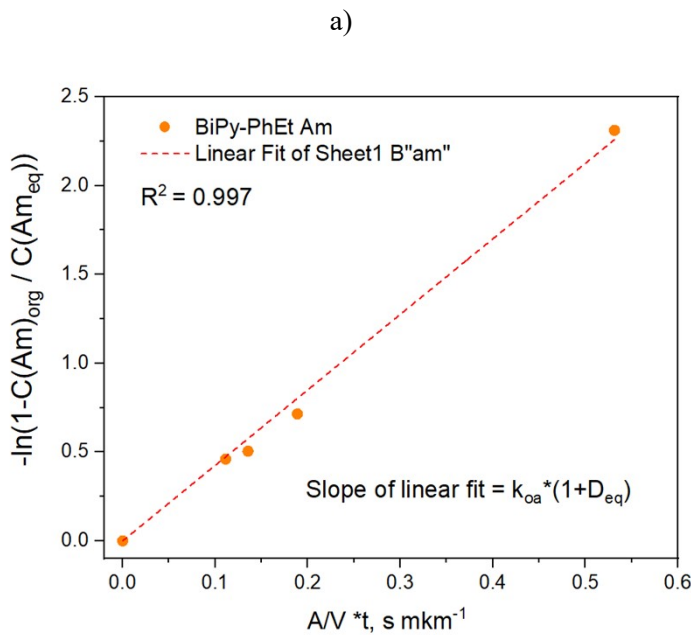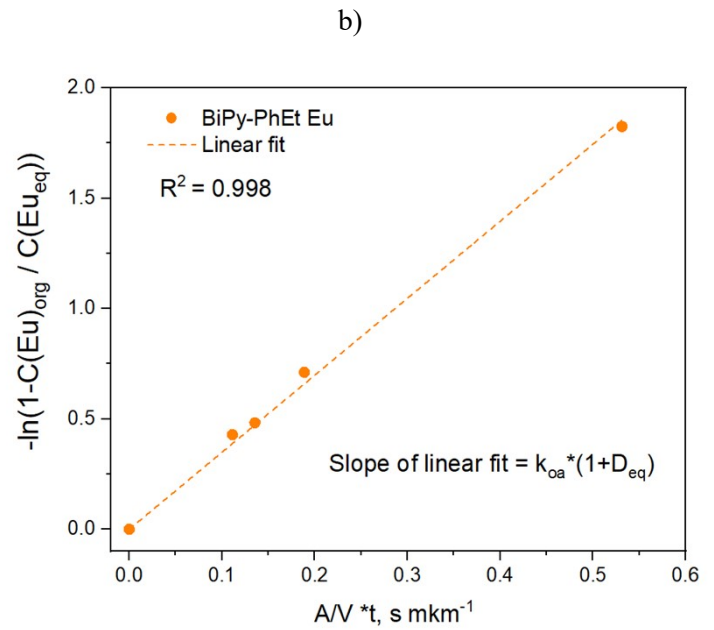

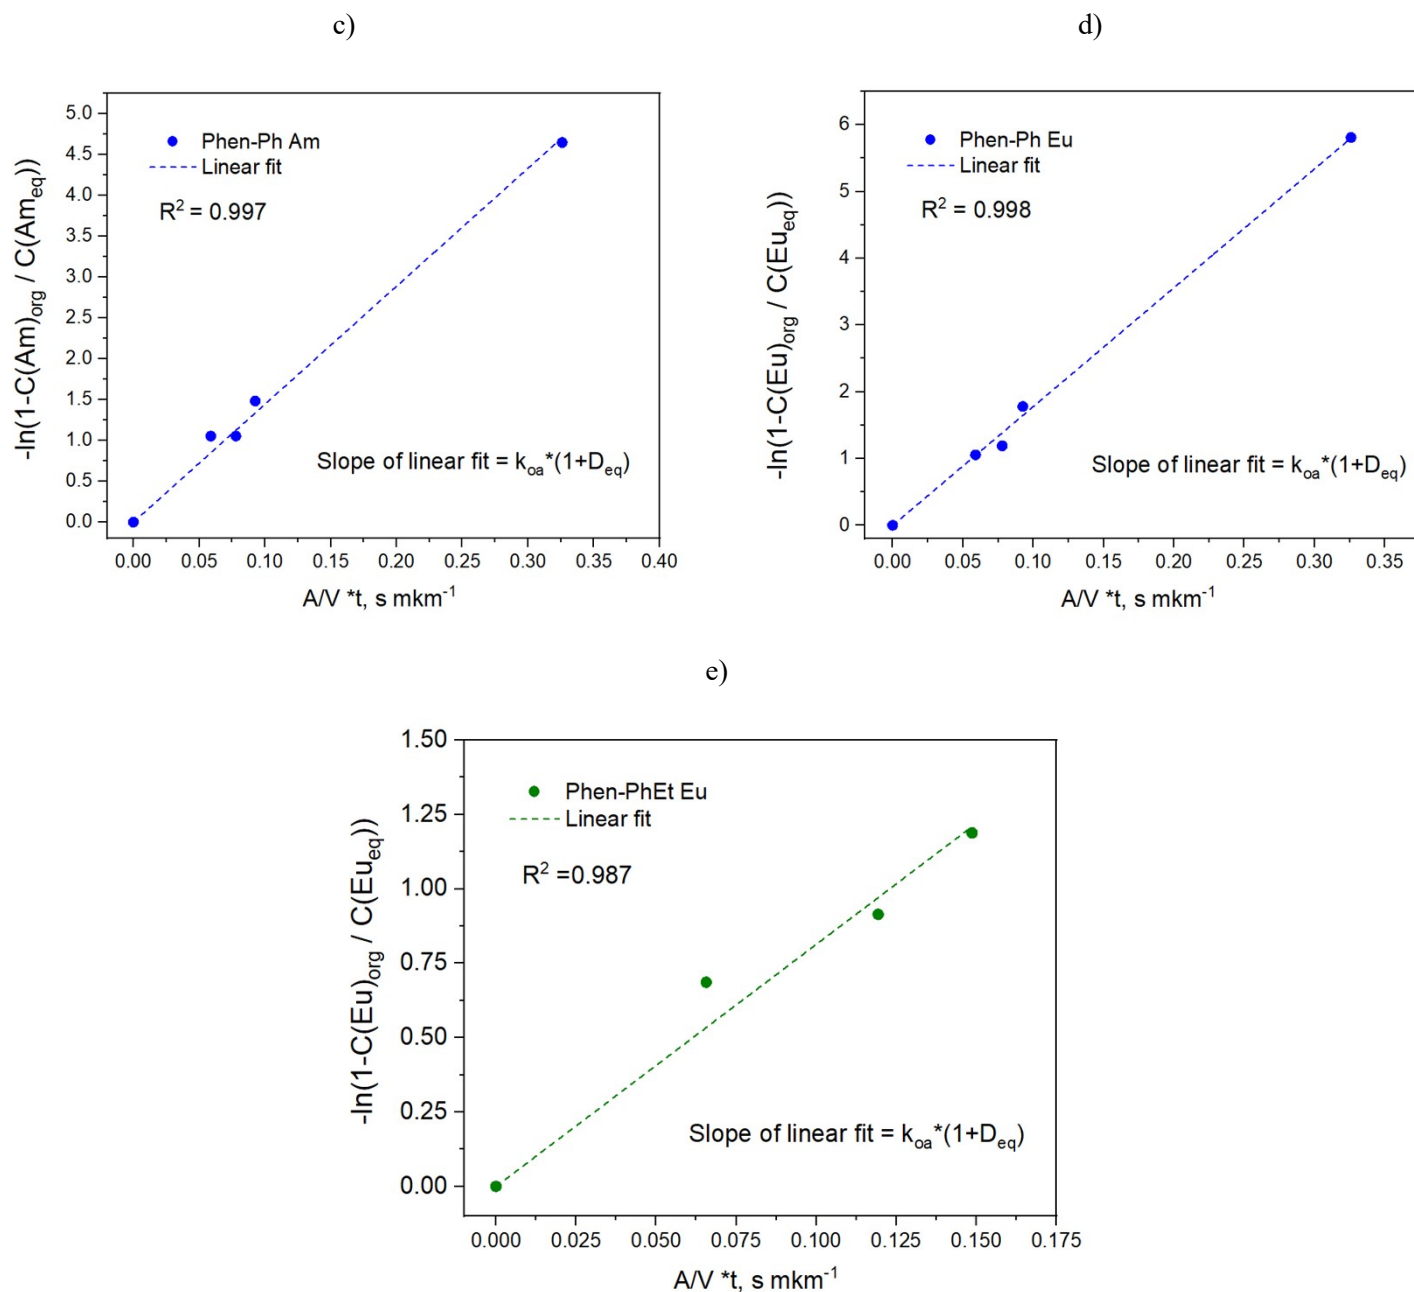

Figure S3 Kinetics data for the experiment: **aqueous phase:**  $\text{HNO}_3$  3 mol  $\text{L}^{-1}$  with  $^{152}\text{Eu}$  radiotracer, **organic phase:**  $\text{C}(\text{Phen-Ph})$  or  $\text{C}(\text{Phen-PhEt}) = 0.01 \text{ mol L}^{-1}$ , or  $\text{C}(\text{BiPy-PhEt}) = 0.05 \text{ mol L}^{-1}$  in F-3,  $T = 23 \pm 1 \text{ }^\circ\text{C}$ .

Table S1 Am(III) interfacial mass transfer rate data.  $k_{\text{obs}}$  corresponds to the slope of the dependence of  $-\ln(1 - C_{\text{org}} / C_{\text{eq}})$  on  $t$  (see Figure S2) The errors are obtained from the values of the standard deviation when performing the linear approximation.

| Ligand    | $k_{\text{oa}}, \text{ mm/s}$   | $k_{\text{ao}}, \text{ mm/s}$   | $k_{\text{obs}}$                |
|-----------|---------------------------------|---------------------------------|---------------------------------|
| BiPy-PhEt | $(1.53 \pm 0.05) \cdot 10^{-3}$ | $(2.72 \pm 0.08) \cdot 10^{-3}$ | $(1.45 \pm 0.02) \cdot 10^{-2}$ |
| Phen-PhEt | -                               | -                               | -                               |
| Phen-Ph   | $(1.93 \pm 0.06) \cdot 10^{-3}$ | $(1.25 \pm 0.04) \cdot 10^{-2}$ | $(2.93 \pm 0.04) \cdot 10^{-2}$ |

## 1.2. Crystal data

Table S2 Crystallographic details for BiPy-PhEt structures.

|                                                              |                                                                 |
|--------------------------------------------------------------|-----------------------------------------------------------------|
| Empirical formula                                            | C <sub>32</sub> H <sub>34</sub> N <sub>4</sub> O <sub>2</sub>   |
| M <sub>w</sub>                                               | 506.63                                                          |
| Temperature (K)                                              | 100(2)                                                          |
| Crystal size (mm <sup>3</sup> )                              | 0.18 × 0.15 × 0.06                                              |
| Crystal system                                               | monoclinic                                                      |
| Space group                                                  | <i>P</i> 2 <sub>1</sub> / <i>n</i>                              |
| <i>a</i> (Å)                                                 | 9.3987(15)                                                      |
| <i>b</i> (Å)                                                 | 11.4649(16)                                                     |
| <i>c</i> (Å)                                                 | 13.311(2)                                                       |
| $\alpha$ (°)                                                 | 90                                                              |
| $\beta$ (°)                                                  | 103.835(5)                                                      |
| $\gamma$ (°)                                                 | 90                                                              |
| <i>V</i> (Å <sup>3</sup> )                                   | 1392.7(4)                                                       |
| <i>Z</i>                                                     | 2                                                               |
| $\rho_{\text{calc}}$ (g/cm <sup>3</sup> )                    | 1.208                                                           |
| $\mu$ (mm <sup>-1</sup> )                                    | 0.076                                                           |
| <i>F</i> (000)                                               | 540                                                             |
| 2 $\theta$ range for data collection (°)                     | 4.75 < 2 $\theta$ < 53.99                                       |
| Reflections collected                                        | 14623                                                           |
| Independent reflections                                      | 3035                                                            |
| Data/restraints/parameters                                   | 3035/0/174                                                      |
| Goodness-of-fit on <i>F</i> <sup>2</sup>                     | 1.021                                                           |
| Final <i>R</i> indexes [ <i>I</i> ≥ 2 $\sigma$ ( <i>I</i> )] | <i>R</i> <sub>1</sub> = 0.0523, <i>wR</i> <sub>2</sub> = 0.0975 |
| Final <i>R</i> indexes [all data]                            | <i>R</i> <sub>1</sub> = 0.0957, <i>wR</i> <sub>2</sub> = 0.1176 |
| Largest diff. peak/hole (e Å <sup>-3</sup> )                 | 0.22 / -0.27                                                    |

Table S3 Significant torsion angles in BiPy-PhEt ligand.

| Torsion angle                                        | °          |
|------------------------------------------------------|------------|
| N1-C1-C1A-N1A (N <sub>py</sub> -N <sub>py</sub> )    | 180.00(13) |
| N1-C5-C6-O1 (N <sub>py</sub> -O <sub>amide</sub> )   | 147.72(17) |
| O1-C6-N2-C7 (O <sub>amide</sub> -C <sub>aryl</sub> ) | 162.03(17) |
